# Supplementary material for: Protective effects of Phyllanthus phillyreifolius extracts against hydrogen peroxide induced oxidative stress in HEK293 cells
Source: PubMed Central journal article supplement (PMC6239330; doi:10.1371/journal.pone.0207672), 2018-11-16
Supplement: pone.0207672.s001.pdf [file pone.0207672.s001.pdf]

## Supplementary data

**S1 Table.** List of primers used for RT-qPCR

| Gene  | Sense primer (5'-3')   | Antisense primer (3'-5') |
|-------|------------------------|--------------------------|
| SOD-1 | ACCAGTGTGCGGCCAATGATG  | GCTGTACCAGTGCAGGTCCTCA   |
| SOD-2 | AAGCTGACGGCTGCATCTGTTG | CGTGCTCCCACACATCAATCCC   |
| GPx   | AGTTCGGACATCAGGAGAA    | AGGGCTTCTATATCGGGTTC     |
| CAT   | AGTCTCGCCGCATCTTCAACAG | TCTGGGACTTCTGGAGCCTACG   |
| GAPDH | GGGAGCCAAAAGGGTCATCA   | TGATGGCATGGACTGTGGTC     |
